# Supplementary material for: OGT Protein Interaction Network (OGT-PIN): A Curated Database of Experimentally Identified Interaction Proteins of OGT
Source: MDPI journal article supplement (doi:10.3390/ijms22179620), 2021-09-06
Supplement: s1 [file s1]

## *Supplementary Materials*

### **OGT Protein Interaction Network (OGT-PIN): A Curated Database of Experimentally Identified Interaction Proteins of OGT**

**Junfeng Ma<sup>1,\*</sup>, Chunyan Hou<sup>2</sup>, Yaoxiang Li<sup>1</sup>, Shufu Chen<sup>3</sup>, Ci Wu<sup>1</sup>**

<sup>1</sup>Department of Oncology, Lombardi Comprehensive Cancer Center, Georgetown University Medical Center, Washington DC, USA.

<sup>2</sup>Dalian Institute of Chemical Physics, Chinese Academy of Sciences, Dalian, Liaoning, China.

<sup>3</sup>School of Engineering, Pennsylvania State University Behrend, Erie, Pennsylvania, USA

\* Correspondence: junfeng.ma@georgetown.edu; Tel.: 1-202-6873802

### ***Table of Contents***

| <b>Description</b>                                                                                                        | <b>Page No.</b> |
|---------------------------------------------------------------------------------------------------------------------------|-----------------|
| Supplementary Figure S1: A representation of the number of times that a specific interactor protein of OGT is identified. | S-2             |
| Supplementary Figure S2: A word cloud representation of all human OGT interactors that appear frequently in OGT-PIN.      | S-3             |
| Supplementary Table S1: The list of all protein interactors of OGT and orthologues.                                       |                 |

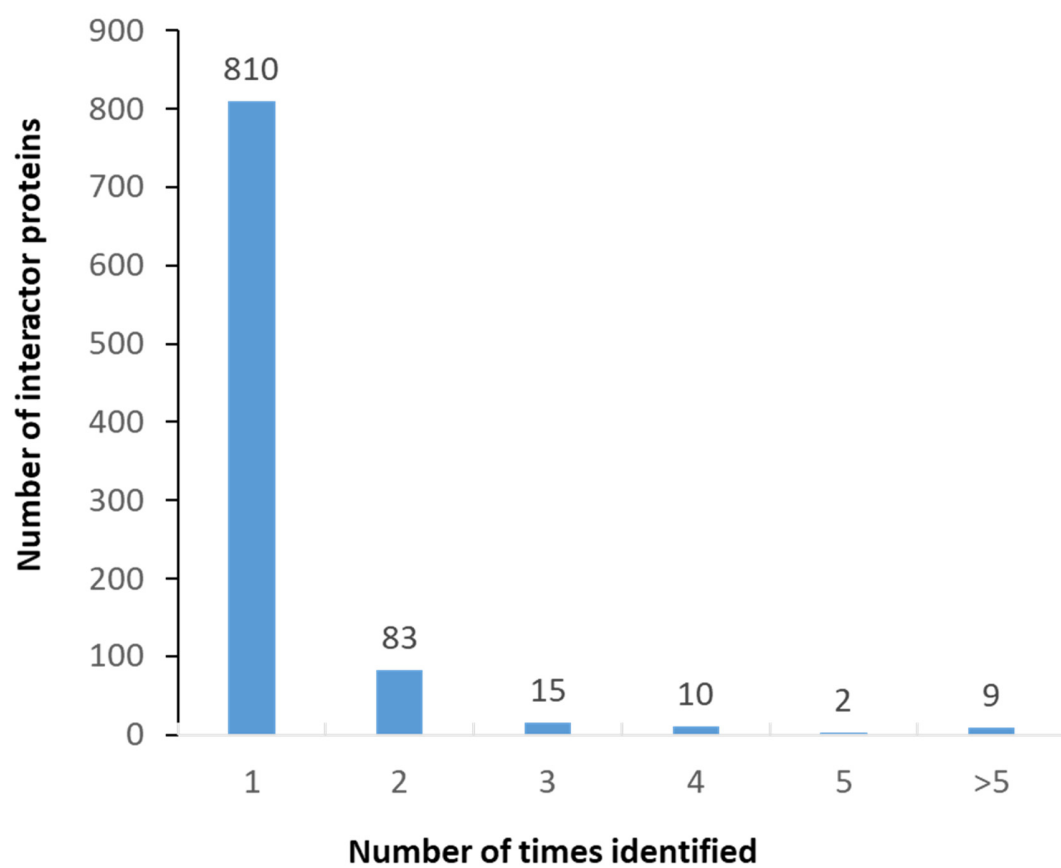

**Supplementary Figure S1.** A representation of the number of times that a specific interactor protein of OGT has been identified.

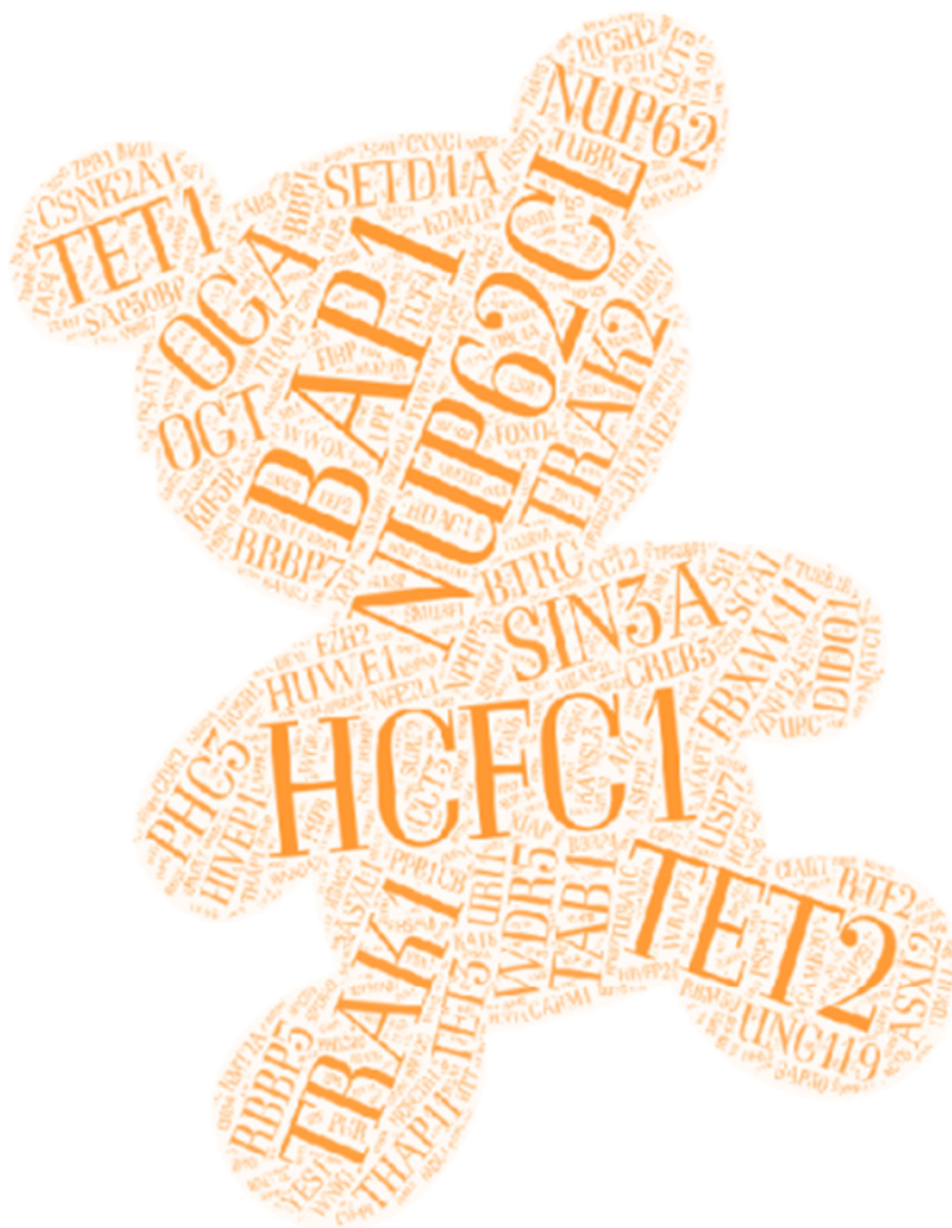

**Supplementary Figure S2.** A word cloud representation of 784 human OGT interactors that appear frequently in OGT-PIN. The size of each word indicates its frequency of overlap in the dataset.
